# Supplementary material
Source: PubMed Central journal article supplement (PMC2825403)

## Titles and legends to supplementary figures

**Supplementary Figure 1.** Fenretinide, bortezomib and thapsigargin induce caspase 3 activity. SH-SY5Y, A375 and SK-MEL-28 cells were treated with fenretinide (SH-SY5Y 5  $\mu$ M; A375/SK-MEL-28 10  $\mu$ M), bortezomib (SH-SY5Y 5 nM; A375/SK-MEL-28 30 nM) or thapsigargin (SH-SY5Y 1.5  $\mu$ M; A375/SK-MEL-28 7.5  $\mu$ M) for 24 hr. Data are expressed relative to control untreated cells; each point is the mean  $\pm$  S.E.M,  $n \geq 3$ .

**Supplementary Figure 2.** A375 cells were transfected with the ATF4 expression vector (pATF4) or control vector (pXL4) prior to treatment with fenretinide (FenR; 15  $\mu$ M), bortezomib (Bort; 50 nM), or thapsigargin (Thap; 10  $\mu$ M) for 24 hr. ATF4 and  $\beta$ -actin expression were determined by western blotting, and apoptosis was measured by flow cytometry of propidium iodide stained cells to determine the sub-G1 fraction. Data are expressed as fold change relative to control untreated cells; each point is the mean  $\pm$  S.E.M,  $n \geq 3$ .

**Supplementary Figure 3.** Role of c-myc and ATF3 on fenretinide- or bortezomib-induced Noxa expression. *A*, top panel, SK-MEL-28 cells were transfected with siRNAs for c-myc or with a non-silencing control siRNA (ctrl) prior to treatment with fenretinide (FenR; 10  $\mu$ M) or bortezomib (Bort; 30 nM) for 6 hr. Bottom panel, SH-SY5Y or A375 cells were treated with fenretinide (SH-SY5Y 5  $\mu$ M; A375 10  $\mu$ M), bortezomib (SH-SY5Y 5 nM; A375 30 nM) or thapsigargin (SH-SY5Y 1.5  $\mu$ M; A375 7.5  $\mu$ M) for 6-24 hr. c-myc, Noxa and  $\beta$ -actin expression were determined by western blotting. *B*, A375 cells were transfected with siRNAs for ATF3, or with a non-silencing control siRNA (ctrl) prior to treatment with fenretinide (FenR; 15  $\mu$ M), bortezomib (Bort; 50 nM), or thapsigargin (Thap; 10  $\mu$ M) for 24 hr. Apoptosis was measured by flow cytometry of propidium iodide stained cells to determine the sub-G1 fraction. Data are expressed as percentage total population; each point is the mean  $\pm$  S.E.M,  $n \geq 3$ . *C*, A375 cells were transfected with siRNAs for ATF3, or with a non-silencing control siRNA (ctrl) prior to treatment with fenretinide (FenR; 10  $\mu$ M), bortezomib (Bort; 30 nM), or thapsigargin (Thap; 7.5  $\mu$ M) for 6 hr. ATF3, Noxa and  $\beta$ -actin expression were determined by western blotting. Noxa mRNA was measured by real-time PCR, relative to  $\beta$ -actin as an internal control.

**Supplementary Figure 4.** Effect of IRE1 or GADD153 knockdown on fenretinide- and bortezomib-induced cell death. *A*, A375 cells were transfected with siRNAs for IRE1, GADD153 (1), or with a non-silencing control siRNA (ctrl) prior to treatment with fenretinide (FenR; 15  $\mu$ M), bortezomib (Bort; 50 nM), or thapsigargin (Thap; 10  $\mu$ M) for 24 hr. Apoptosis was measured by flow cytometry of propidium iodide stained cells to determine the sub-G1 fraction. Data are expressed as percentage total population; each point is the mean  $\pm$  S.E.M,  $n \geq 3$ . *B*, A375 cells were transfected with siRNAs for IRE1, or with a non-silencing control siRNA (ctrl) prior to treatment with fenretinide (FenR; 10  $\mu$ M), bortezomib (Bort; 30 nM), or thapsigargin (Thap; 7.5  $\mu$ M) for 6 hr. IRE1 $\alpha$ , XBP-1s, Noxa and  $\beta$ -actin expression were determined by western blotting. *C*, A375 cells were transfected with siRNAs for GADD153 (1), GADD153 (2), or with a non-silencing control siRNA (ctrl) prior to treatment with fenretinide (FenR; 10  $\mu$ M), bortezomib (Bort; 30 nM), or thapsigargin (Thap; 7.5  $\mu$ M) for 6 hr. GADD153, Noxa and  $\beta$ -actin expression were determined by western blotting. GADD153 and Noxa mRNA were measured by real-time PCR, relative to  $\beta$ -actin as an internal control.

**Supplementary Figure 5.** Effect of p8 knockdown on the induction of ATF4 by fenretinide and bortezomib. *A,B* A375 cells were transfected with siRNAs for p8, or with a non-silencing control siRNA (ctrl) prior to treatment with fenretinide (FenR; 10  $\mu$ M), bortezomib (Bort; 30 nM), or thapsigargin (Thap; 7.5  $\mu$ M) for 6 hr. p8 and ATF4 mRNA were measured by real-time PCR, relative to  $\beta$ -actin as an internal control.

Supplementary Figure 1

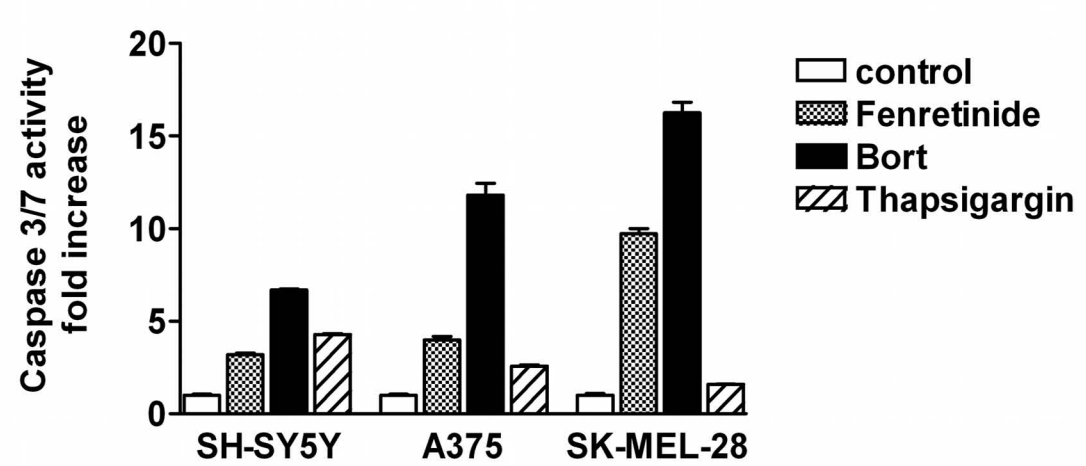

Supplementary Figure 2

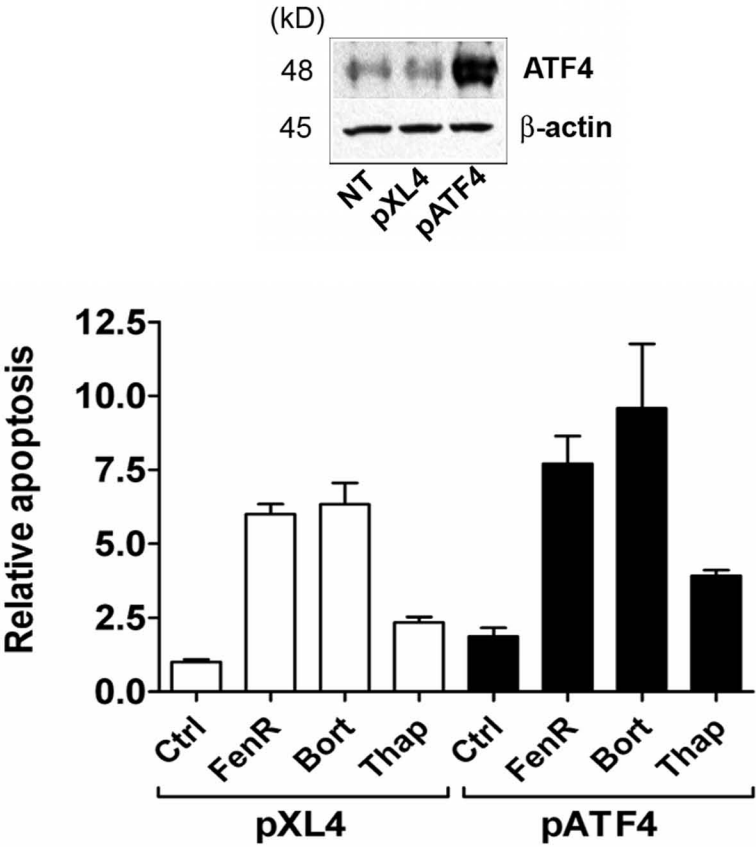

Supplementary Figure 3

A

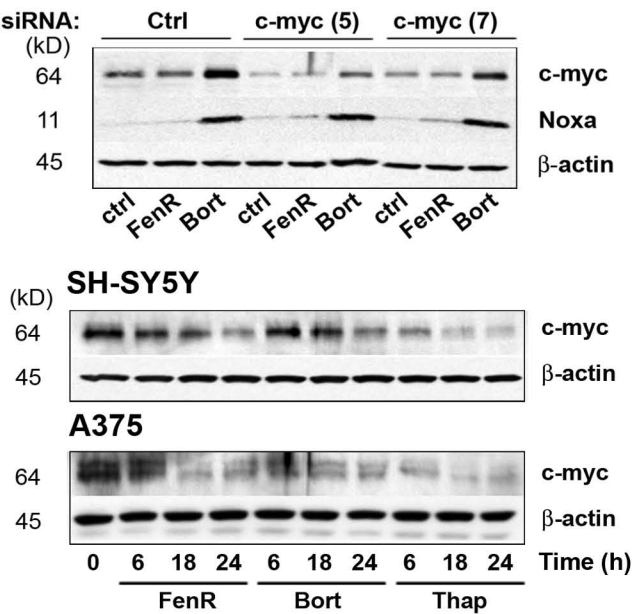

B

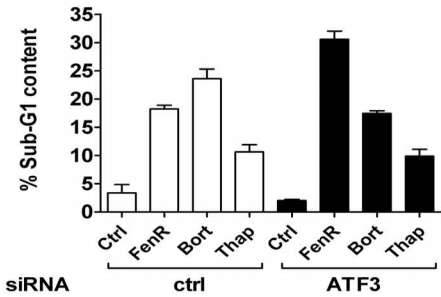

C

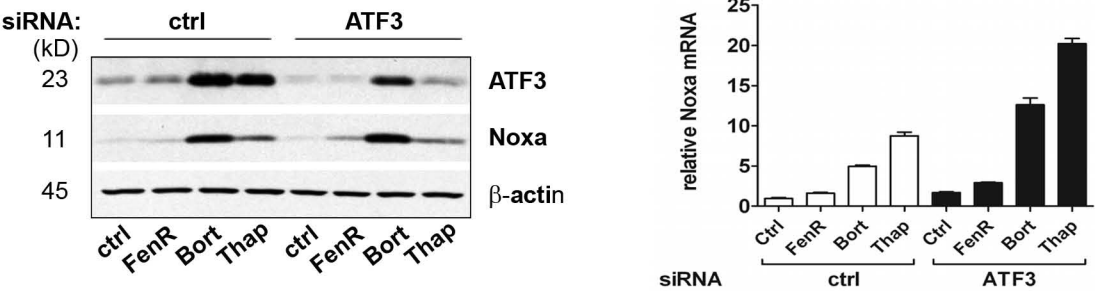

Supplementary Figure 4

**A**

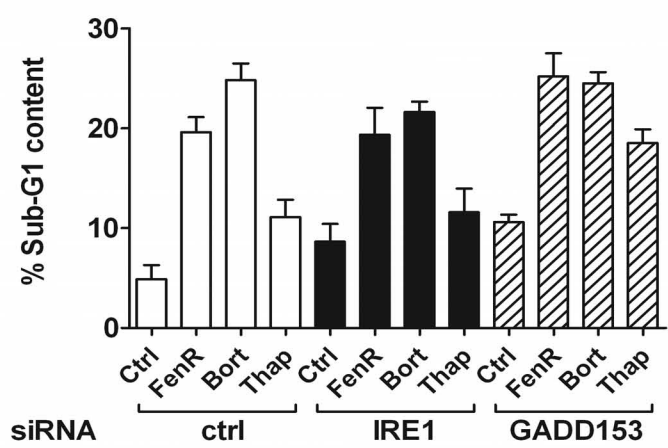

**B**

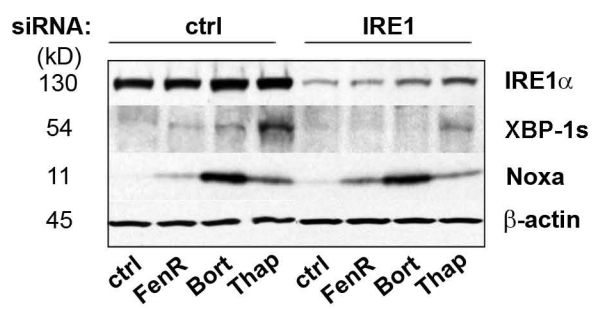

**C**

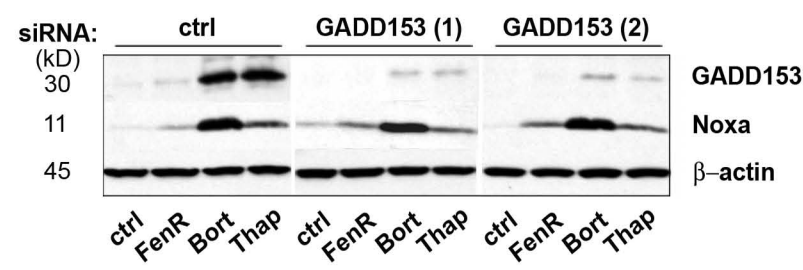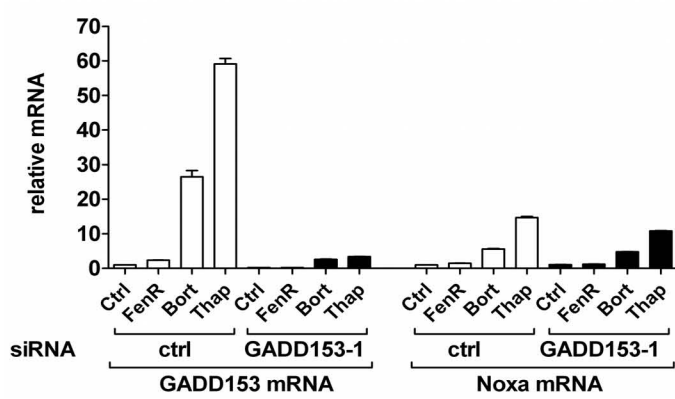

Supplementary Figure 5

**A**

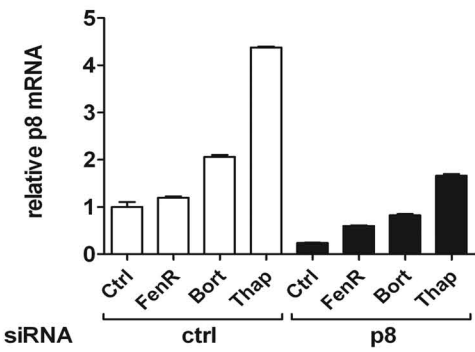

**B**

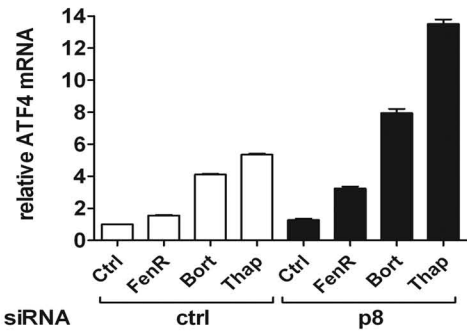

Supplement: supp_M109.014092_jbc.M109.014092-1.pdf [file supp_M109.014092_jbc.M109.014092-1.pdf]
